# Supplementary material
Source: publisher figshare collection journal article supplement (https://sage.figshare.com/ndownloader/files/20804676)
Supplement: Supplementary file 1 [file 20804676]

## Supplementary Material

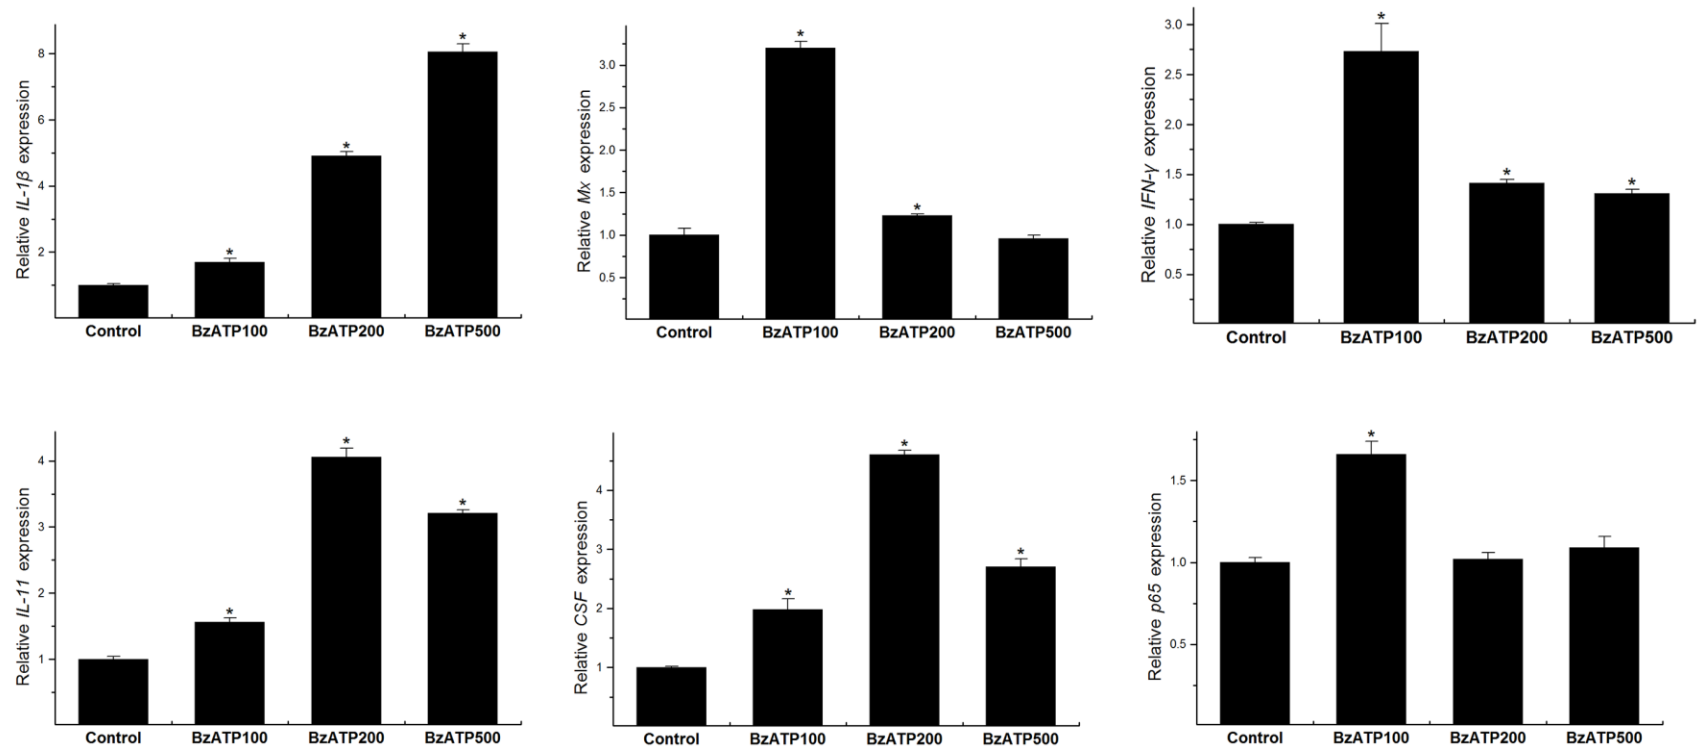

**Supplementary Figure 1.** BzATP-induced immune-related gene expression in Japanese flounder head kidney cells. IL-1 $\beta$ , Mx, IFN, IL-11, CSF and p65 gene expression changes after 100, 200 or 500  $\mu$ M BzATP treatment for 2 h in Japanese flounder head kidney cells were analyzed by qRT-PCR with beta-actin as a reference gene and are presented as fold change relative to untreated control groups (normalized to 1). Results are expressed as the mean  $\pm$  SEM of triplicate experiments. Asterisks (\*) mark the significant increase of target gene expression compared with the untreated control groups ( $p < 0.05$ ).
